# Supplementary material for: Introducing antiferromagnetic ordering on the surface states of a Bi2Se3 topological insulator by europium doping
Source: Royal Society of Chemistry journal article supplement (doi:10.1039/d4tc02226b), 2024-01-01
Supplement: d4tc02226b1.pdf [file d4tc02226b1.pdf]

## Electronic Supplementary Information

### Introducing antiferromagnetic ordering on the surface states of $\text{Bi}_2\text{Se}_3$ topological insulator by Europium doping

*Sumana Paul<sup>1¶</sup>, Moumita Das,<sup>2,3</sup> Sujoy Datta<sup>4</sup>, Raja Chakraborty<sup>3</sup>, Prabhat Mandal<sup>2</sup> and P. K. Giri<sup>1,5\*</sup>*

<sup>1</sup>Centre for Nanotechnology, Indian Institute of Technology Guwahati, Guwahati 781039, India

<sup>2</sup>Saha Institute of Nuclear Physics, HBNI, 1/AF Bidhannagar, Kolkata 700064, India

<sup>3</sup>School of Physical Sciences, Indian Association for the Cultivation of Science, Jadavpur, Kolkata-700032, India

<sup>4</sup>Kadihati KNM High School, Ganti, Kolkata 700135, India

<sup>5</sup>Department of Physics, Indian Institute of Technology Guwahati, Guwahati 781039, India

¶ Present Address: CSIR-Central Glass and Ceramic Research Institute, 196 Raja S. C. Mullick Road, Kolkata 700 032, India

---

\*Corresponding authors, email: [giri@iitg.ac.in](mailto:giri@iitg.ac.in)

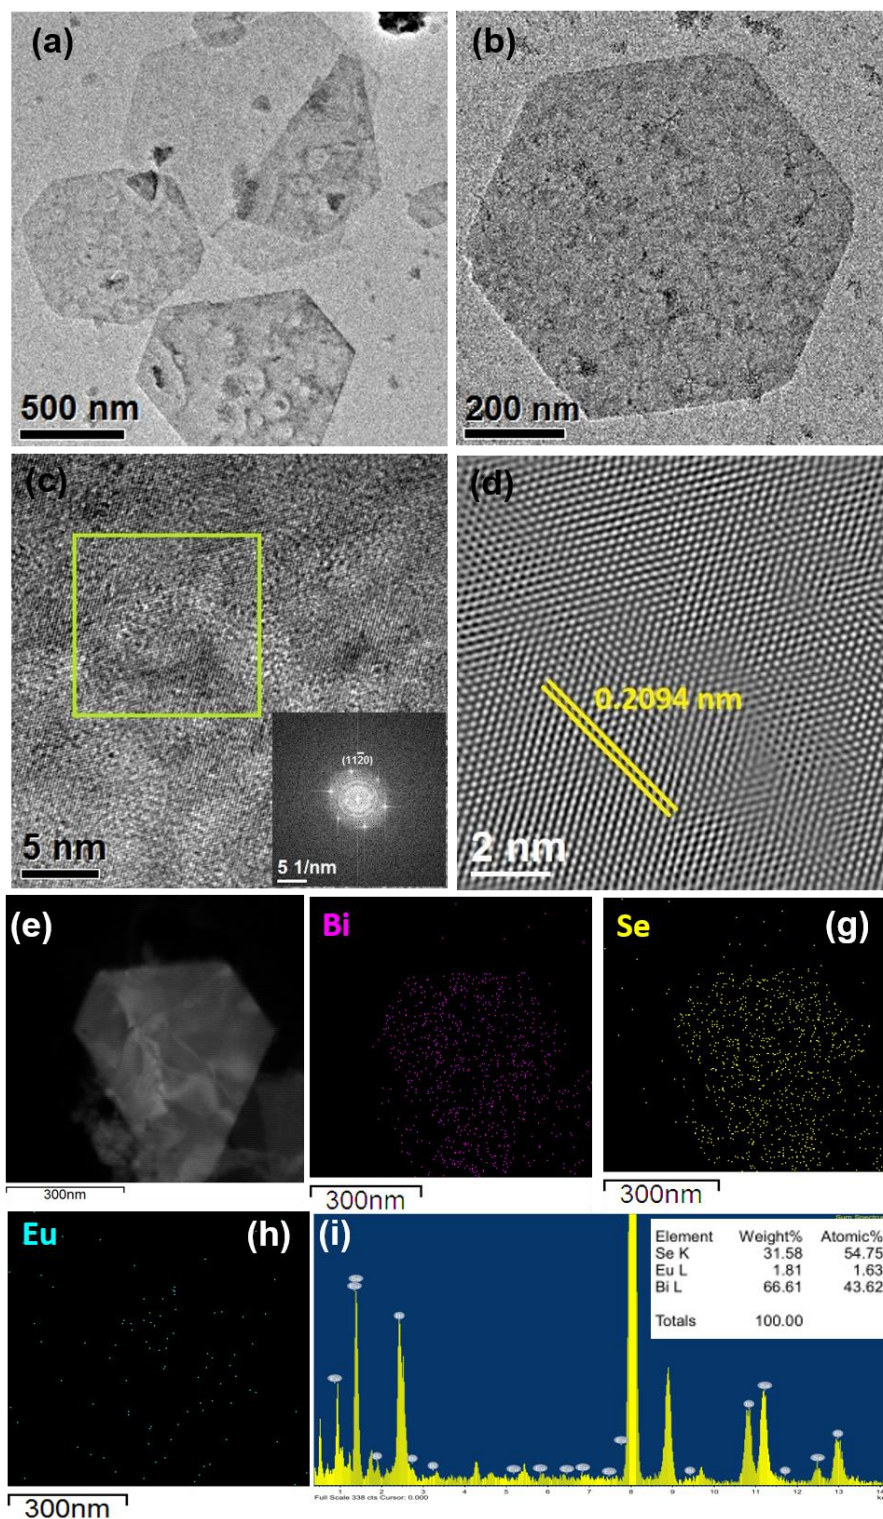

**Figure S1.** (a) Large area inverted TEM image of undoped 5% Eu doped  $\text{Bi}_2\text{Se}_3$  NSs. (b) A closer view of a single nanosheet. (c) HRTEM lattice image of a single MS; the inset shows the FFT pattern of the (11-20) group of planes as obtained from the yellow squared region of HRTEM image of  $\text{Bi}_2\text{Se}_3$ . (d) Reconstructed HRTEM image showing the  $d$  spacing value of 0.209 nm corresponding to the group of planes (11-20). (e) Scanning TEM image of  $\text{Bi}_2\text{Se}_3$  nanosheet and corresponding STEM elemental mapping of (f) Bi, (g) Se and (h) Eu atoms, respectively. (i) Energy dispersive X-ray (EDX) spectrum of  $\text{Bi}_2\text{Se}_3$  MS showing the atomic percentage of different elements.

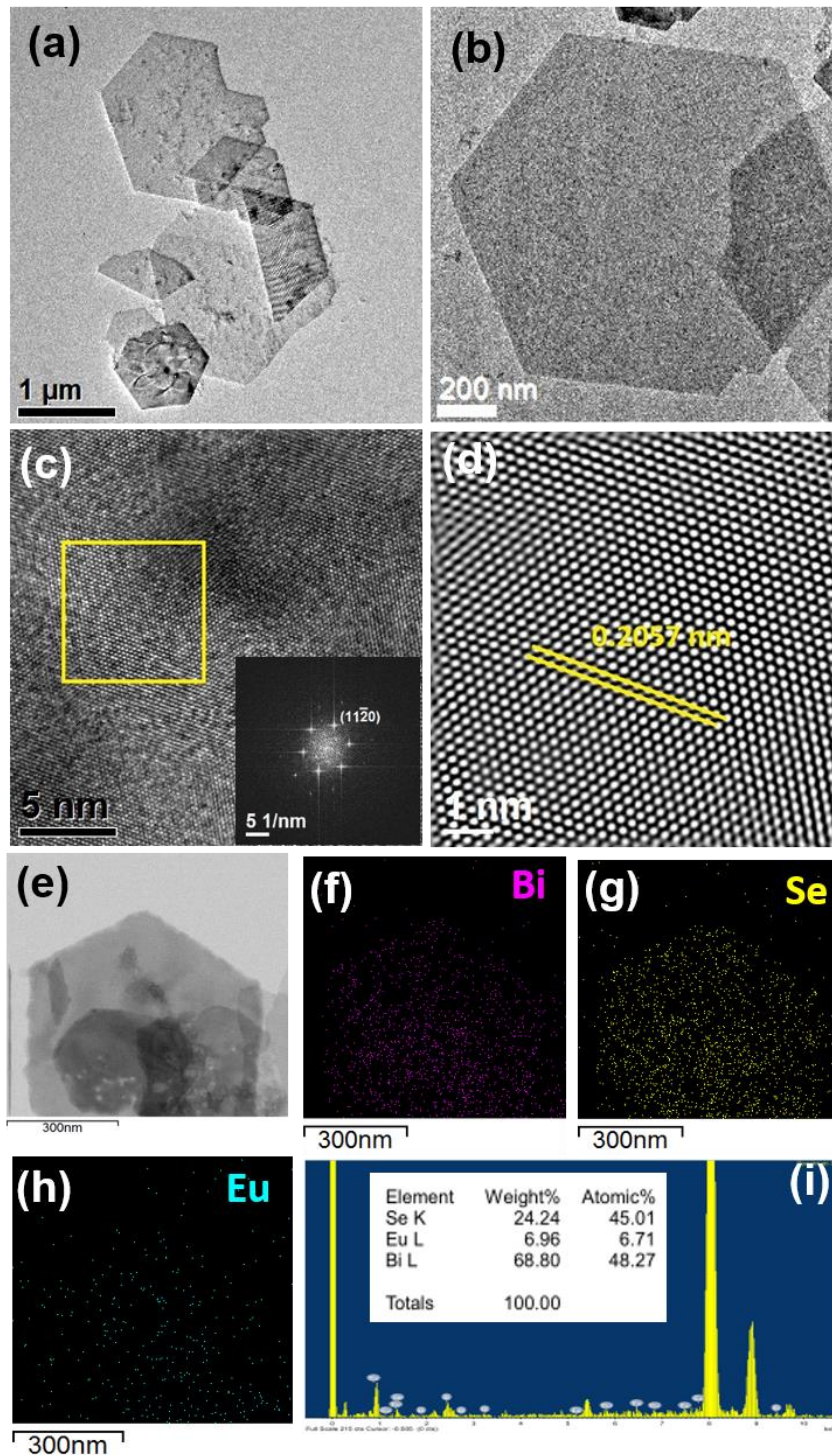

**Figure S2.** (a) Large area inverted TEM image of undoped 10% Eu doped  $\text{Bi}_2\text{Se}_3$  NSs. (b) A closer view of a single nanosheet. (c) HRTEM lattice image of a single MS; the inset shows the FFT pattern of the (11-20) group of planes as obtained from the yellow squared region of HRTEM image of  $\text{Bi}_2\text{Se}_3$ . (d) Reconstructed HRTEM image showing the  $d$  spacing value of 0.205 nm corresponding to the group of planes (11-20). (e) Scanning TEM image of  $\text{Bi}_2\text{Se}_3$  nanosheet and corresponding STEM elemental mapping of (f) Bi, (g) Se and (h) Eu atoms, respectively. (i) Energy dispersive X-ray (EDX) spectrum of  $\text{Bi}_2\text{Se}_3$  MS showing the atomic percentage of different elements.



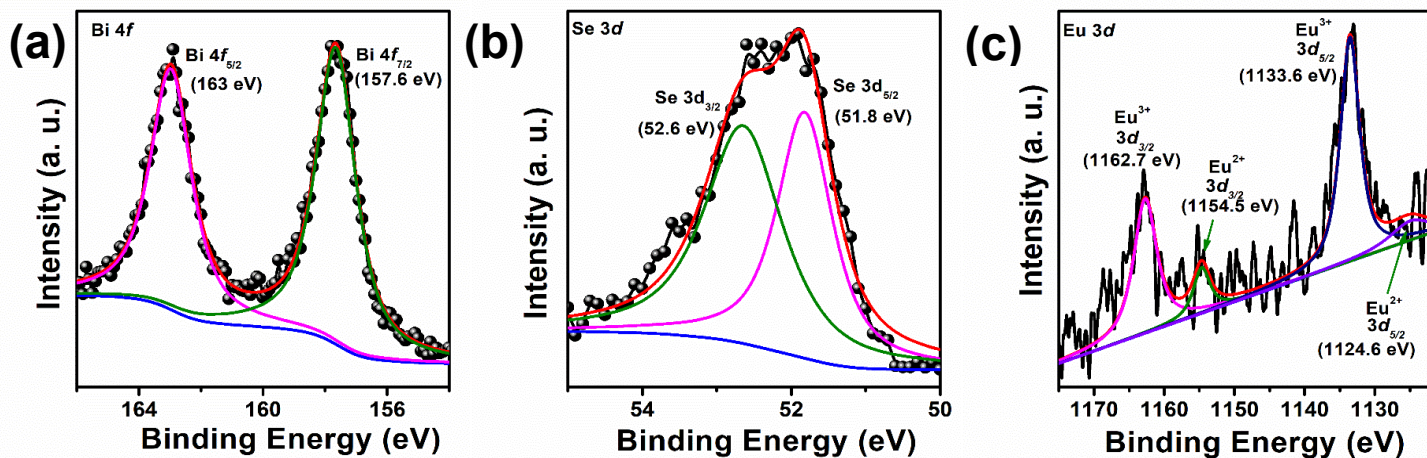

**Figure S3.** Lorentzian fitted XPS spectrum of the elements: (a) Bi 4f core-level, (b) Se 3d core-level, (c) Eu 3d core-level. The solid lines refer to the fitted peaks with a Shirley baseline, and the symbols correspond to the experimental data.

# Bi2Se3

data\_Bi2Se3

\_audit\_creation\_method

\_cell\_length\_a 4.1888195996

\_cell\_length\_b 4.1888195996

\_cell\_length\_c 30.8113039972

\_cell\_angle\_alpha 90.0000000000

\_cell\_angle\_beta 90.0000000000

\_cell\_angle\_gamma 120.0000000000

\_cell\_volume 468.1920387017

\_symmetry\_space\_group\_name\_H-M "R -3 2/m (hexagonal axes)"

\_symmetry\_Int\_Tables\_number 166

\_space\_group.reference\_setting '166:-R 3 2'''

\_space\_group.transform\_Pp\_abc a,b,c;0,0,0

loop\_

\_space\_group\_symop\_id

\_space\_group\_symop\_operation\_xyz

1 x,y,z

2 -y,x-y,z

3 -x+y,-x,z

4 y,x,-z

5 -x,-x+y,-z

6 x-y,-y,-z

$$7 \ -x, -y, -z$$

$$8 \ y, -x+y, -z$$

$$9 \ x-y, x, -z$$

$$10 \ -y, -x, z$$

$$11 \ x, x-y, z$$

$$12 \ -x+y, y, z$$

$$13 \ x+1/3, y+2/3, z+2/3$$

$$14 \ -y+1/3, x-y+2/3, z+2/3$$

$$15 \ -x+y+1/3, -x+2/3, z+2/3$$

$$16 \ y+1/3, x+2/3, -z+2/3$$

$$17 \ -x+1/3, -x+y+2/3, -z+2/3$$

$$18 \ x-y+1/3, -y+2/3, -z+2/3$$

$$19 \ -x+1/3, -y+2/3, -z+2/3$$

$$20 \ y+1/3, -x+y+2/3, -z+2/3$$

$$21 \ x-y+1/3, x+2/3, -z+2/3$$

$$22 \ -y+1/3, -x+2/3, z+2/3$$

$$23 \ x+1/3, x-y+2/3, z+2/3$$

$$24 \ -x+y+1/3, y+2/3, z+2/3$$

$$25 \ x+2/3, y+1/3, z+1/3$$

$$26 \ -y+2/3, x-y+1/3, z+1/3$$

$$27 \ -x+y+2/3, -x+1/3, z+1/3$$

$$28 \ y+2/3, x+1/3, -z+1/3$$

$$29 \ -x+2/3, -x+y+1/3, -z+1/3$$

$$30 \ x-y+2/3, -y+1/3, -z+1/3$$

$$31 \ -x+2/3, -y+1/3, -z+1/3$$

$$32 \ y+2/3, -x+y+1/3, -z+1/3$$

$$33 \ x-y+2/3, x+1/3, -z+1/3$$

$$34 \ -y+2/3, -x+1/3, z+1/3$$

$$35 \ x+2/3, x-y+1/3, z+1/3$$

$$36 \ -x+y+2/3, y+1/3, z+1/3$$

loop\_

\_atom\_site\_label

\_atom\_site\_type\_symbol

\_atom\_site\_symmetry\_multiplicity

\_atom\_site\_Wyckoff\_symbol

\_atom\_site\_fract\_x

\_atom\_site\_fract\_y

\_atom\_site\_fract\_z

\_atom\_site\_occupancy

\_atom\_site\_fract\_symmform

Bi1 Bi 6 c 0.00000 0.00000 0.39658 1.00000 0,0,Dz

Se1 Se 3 a 0.00000 0.00000 0.00000 1.00000 0,0,0

Se2 Se 6 c 0.00000 0.00000 0.78071 1.00000 0,0,Dz

# end of cif

#=====

# CRYSTAL DATA

#-----

data\_Bi15Eu1Se24

\_chemical\_name\_common            'Bi15Eu1Se24'  
\_cell\_length\_a                    21.177450  
\_cell\_length\_b                    21.177450  
\_cell\_length\_c                    21.177450  
\_cell\_angle\_alpha                 22.840445  
\_cell\_angle\_beta                 22.840445  
\_cell\_angle\_gamma                22.840445  
\_cell\_volume                      1255.734964  
\_space\_group\_name\_H-M\_alt        'P 1'  
\_space\_group\_IT\_number            1

loop\_

\_space\_group\_symop\_operation\_xyz  
'x, y, z'

loop\_

\_atom\_site\_label  
\_atom\_site\_occupancy  
\_atom\_site\_fract\_x  
\_atom\_site\_fract\_y  
\_atom\_site\_fract\_z  
\_atom\_site\_adp\_type  
\_atom\_site\_U\_iso\_or\_equiv  
\_atom\_site\_type\_symbol  
Bi1    1.0   0.197266   0.201268   0.197266   Uiso ? Bi  
Bi2    1.0   0.198225   0.198050   0.698050   Uiso ? Bi  
Bi3    1.0   0.198132   0.698132   0.198132   Uiso ? Bi  
Bi4    1.0   0.197266   0.697266   0.701268   Uiso ? Bi  
Bi5    1.0   0.698050   0.198050   0.198225   Uiso ? Bi  
Bi6    1.0   0.701268   0.697266   0.197266   Uiso ? Bi



|      |     |          |          |          |      |      |
|------|-----|----------|----------|----------|------|------|
| Bi7  | 1.0 | 0.698050 | 0.698225 | 0.698050 | Uiso | ? Bi |
| Bi8  | 1.0 | 0.301894 | 0.302291 | 0.301894 | Uiso | ? Bi |
| Bi9  | 1.0 | 0.303171 | 0.301573 | 0.801573 | Uiso | ? Bi |
| Bi10 | 1.0 | 0.301067 | 0.801067 | 0.301067 | Uiso | ? Bi |
| Bi11 | 1.0 | 0.301894 | 0.801894 | 0.802291 | Uiso | ? Bi |
| Bi12 | 1.0 | 0.801573 | 0.301573 | 0.303171 | Uiso | ? Bi |
| Bi13 | 1.0 | 0.802030 | 0.302030 | 0.802030 | Uiso | ? Bi |
| Bi14 | 1.0 | 0.802291 | 0.801894 | 0.301894 | Uiso | ? Bi |
| Bi15 | 1.0 | 0.801573 | 0.803171 | 0.801573 | Uiso | ? Bi |
| Eu1  | 1.0 | 0.696117 | 0.196117 | 0.696117 | Uiso | ? Eu |
| Se1  | 1.0 | 0.000043 | 0.000301 | 0.000043 | Uiso | ? Se |
| Se2  | 1.0 | 0.992021 | 0.004437 | 0.504437 | Uiso | ? Se |
| Se3  | 1.0 | 0.999865 | 0.499865 | 0.999865 | Uiso | ? Se |
| Se4  | 1.0 | 0.000043 | 0.500043 | 0.500301 | Uiso | ? Se |
| Se5  | 1.0 | 0.504437 | 0.004437 | 0.992021 | Uiso | ? Se |
| Se6  | 1.0 | 0.500173 | 0.000173 | 0.500173 | Uiso | ? Se |
| Se7  | 1.0 | 0.500301 | 0.500043 | 0.000043 | Uiso | ? Se |
| Se8  | 1.0 | 0.504437 | 0.492021 | 0.504437 | Uiso | ? Se |
| Se9  | 1.0 | 0.389949 | 0.390114 | 0.389949 | Uiso | ? Se |
| Se10 | 1.0 | 0.391199 | 0.388077 | 0.888077 | Uiso | ? Se |
| Se11 | 1.0 | 0.390141 | 0.890141 | 0.390141 | Uiso | ? Se |
| Se12 | 1.0 | 0.389949 | 0.889949 | 0.890114 | Uiso | ? Se |
| Se13 | 1.0 | 0.888077 | 0.388077 | 0.391199 | Uiso | ? Se |
| Se14 | 1.0 | 0.889985 | 0.389985 | 0.889985 | Uiso | ? Se |
| Se15 | 1.0 | 0.890114 | 0.889949 | 0.389949 | Uiso | ? Se |
| Se16 | 1.0 | 0.888077 | 0.891199 | 0.888077 | Uiso | ? Se |
| Se17 | 1.0 | 0.110629 | 0.109158 | 0.110629 | Uiso | ? Se |
| Se18 | 1.0 | 0.110205 | 0.110205 | 0.610205 | Uiso | ? Se |
| Se19 | 1.0 | 0.110283 | 0.610283 | 0.110283 | Uiso | ? Se |
| Se20 | 1.0 | 0.110629 | 0.610629 | 0.609158 | Uiso | ? Se |
| Se21 | 1.0 | 0.610205 | 0.110205 | 0.110205 | Uiso | ? Se |
| Se22 | 1.0 | 0.610007 | 0.110007 | 0.610007 | Uiso | ? Se |
| Se23 | 1.0 | 0.609158 | 0.610629 | 0.110629 | Uiso | ? Se |
| Se24 | 1.0 | 0.610205 | 0.610205 | 0.610205 | Uiso | ? Se |

#=====

# CRYSTAL DATA

#-----

data\_Bi14Eu2Se24

\_chemical\_name\_common           'Bi14Eu2Se24'           '  
\_cell\_length\_a                   21.139488  
\_cell\_length\_b                   21.139488  
\_cell\_length\_c                   21.139488  
\_cell\_angle\_alpha                22.883610  
\_cell\_angle\_beta                 22.883610  
\_cell\_angle\_gamma                22.883610  
\_cell\_volume                     1253.527361  
\_space\_group\_name\_H-M\_alt        'P 1'  
\_space\_group\_IT\_number            1

loop\_

\_space\_group\_symop\_operation\_xyz  
'x, y, z'

loop\_

\_atom\_site\_label  
\_atom\_site\_occupancy  
\_atom\_site\_fract\_x  
\_atom\_site\_fract\_y  
\_atom\_site\_fract\_z  
\_atom\_site\_adp\_type  
\_atom\_site\_U\_iso\_or\_equiv  
\_atom\_site\_type\_symbol

|     |     |          |          |          |      |      |
|-----|-----|----------|----------|----------|------|------|
| Bi1 | 1.0 | 0.197284 | 0.702029 | 0.197284 | Uiso | ? Bi |
| Bi2 | 1.0 | 0.197957 | 0.698185 | 0.698185 | Uiso | ? Bi |
| Bi3 | 1.0 | 0.198126 | 0.198126 | 0.198126 | Uiso | ? Bi |
| Bi4 | 1.0 | 0.197284 | 0.197284 | 0.702029 | Uiso | ? Bi |
| Bi5 | 1.0 | 0.698185 | 0.698185 | 0.197957 | Uiso | ? Bi |
| Bi6 | 1.0 | 0.702029 | 0.197284 | 0.197284 | Uiso | ? Bi |

|      |     |          |          |          |           |
|------|-----|----------|----------|----------|-----------|
| Bi7  | 1.0 | 0.698185 | 0.197957 | 0.698185 | Uiso ? Bi |
| Bi8  | 1.0 | 0.301815 | 0.802043 | 0.301815 | Uiso ? Bi |
| Bi9  | 1.0 | 0.297971 | 0.802716 | 0.802716 | Uiso ? Bi |
| Bi10 | 1.0 | 0.301815 | 0.301815 | 0.802043 | Uiso ? Bi |
| Bi11 | 1.0 | 0.802716 | 0.802716 | 0.297971 | Uiso ? Bi |
| Bi12 | 1.0 | 0.801874 | 0.801874 | 0.801874 | Uiso ? Bi |
| Bi13 | 1.0 | 0.802043 | 0.301815 | 0.301815 | Uiso ? Bi |
| Bi14 | 1.0 | 0.802716 | 0.297971 | 0.802716 | Uiso ? Bi |
| Eu1  | 1.0 | 0.695502 | 0.695502 | 0.695502 | Uiso ? Eu |
| Eu2  | 1.0 | 0.304498 | 0.304498 | 0.304498 | Uiso ? Eu |
| Se1  | 1.0 | 0.000000 | 0.500000 | 0.000000 | Uiso ? Se |
| Se2  | 1.0 | 0.000000 | 0.500000 | 0.500000 | Uiso ? Se |
| Se3  | 1.0 | 0.000000 | 0.000000 | 0.000000 | Uiso ? Se |
| Se4  | 1.0 | 0.000000 | 0.000000 | 0.500000 | Uiso ? Se |
| Se5  | 1.0 | 0.500000 | 0.500000 | 0.000000 | Uiso ? Se |
| Se6  | 1.0 | 0.500000 | 0.500000 | 0.500000 | Uiso ? Se |
| Se7  | 1.0 | 0.500000 | 0.000000 | 0.000000 | Uiso ? Se |
| Se8  | 1.0 | 0.500000 | 0.000000 | 0.500000 | Uiso ? Se |
| Se9  | 1.0 | 0.389954 | 0.890146 | 0.389954 | Uiso ? Se |
| Se10 | 1.0 | 0.394979 | 0.886181 | 0.886181 | Uiso ? Se |
| Se11 | 1.0 | 0.390495 | 0.390495 | 0.390495 | Uiso ? Se |
| Se12 | 1.0 | 0.389954 | 0.389954 | 0.890146 | Uiso ? Se |
| Se13 | 1.0 | 0.886181 | 0.886181 | 0.394979 | Uiso ? Se |
| Se14 | 1.0 | 0.889911 | 0.889911 | 0.889911 | Uiso ? Se |
| Se15 | 1.0 | 0.890146 | 0.389954 | 0.389954 | Uiso ? Se |
| Se16 | 1.0 | 0.886181 | 0.394979 | 0.886181 | Uiso ? Se |
| Se17 | 1.0 | 0.113819 | 0.605021 | 0.113819 | Uiso ? Se |
| Se18 | 1.0 | 0.109854 | 0.610046 | 0.610046 | Uiso ? Se |
| Se19 | 1.0 | 0.110089 | 0.110089 | 0.110089 | Uiso ? Se |
| Se20 | 1.0 | 0.113819 | 0.113819 | 0.605021 | Uiso ? Se |
| Se21 | 1.0 | 0.610046 | 0.610046 | 0.109854 | Uiso ? Se |
| Se22 | 1.0 | 0.609505 | 0.609505 | 0.609505 | Uiso ? Se |
| Se23 | 1.0 | 0.605021 | 0.113819 | 0.113819 | Uiso ? Se |
| Se24 | 1.0 | 0.610046 | 0.109854 | 0.610046 | Uiso ? Se |
